# Supplementary material for: A remarkable sensitivity enhancement in a gold nanoparticle-based lateral flow immunoassay for the detection of Escherichia coli O157:H7
Source: Royal Society of Chemistry journal article supplement (doi:10.1039/c5ra06237c), 2015-01-01
Supplement: c5ra06237c1.pdf [file c5ra06237c1.pdf]

**Electronic Supplementary Information for**

**A remarkable sensitivity enhancement in gold  
nanoparticles based lateral flow immunoassay for the  
detection of *Escherichia coli* O157:H7**

Xi Cui,<sup>a, b</sup> Youju Huang,<sup>\*b</sup> Jingyun Wang,<sup>a, b</sup> Lei Zhang,<sup>b</sup> Yun Rong,<sup>b</sup> Weihua Lai<sup>\*a</sup> and Tao Chen<sup>\*b</sup>

<sup>a</sup>State Key Laboratory of Food Science and Technology, Nanchang University, Nanchang 330047, China.

<sup>b</sup>Division of Polymer and Composite Materials, Ningbo Institute of Material Technology and Engineering, Chinese Academy of Science, No. 1219 Zhongguan West Road, Zhenhai District, Ningbo 315201, China

---

\*Corresponding author: e-mail: yjhuang@nimte.ac.cn; tao.chen@nimte.ac.cn; talktolaiwh@163.com.

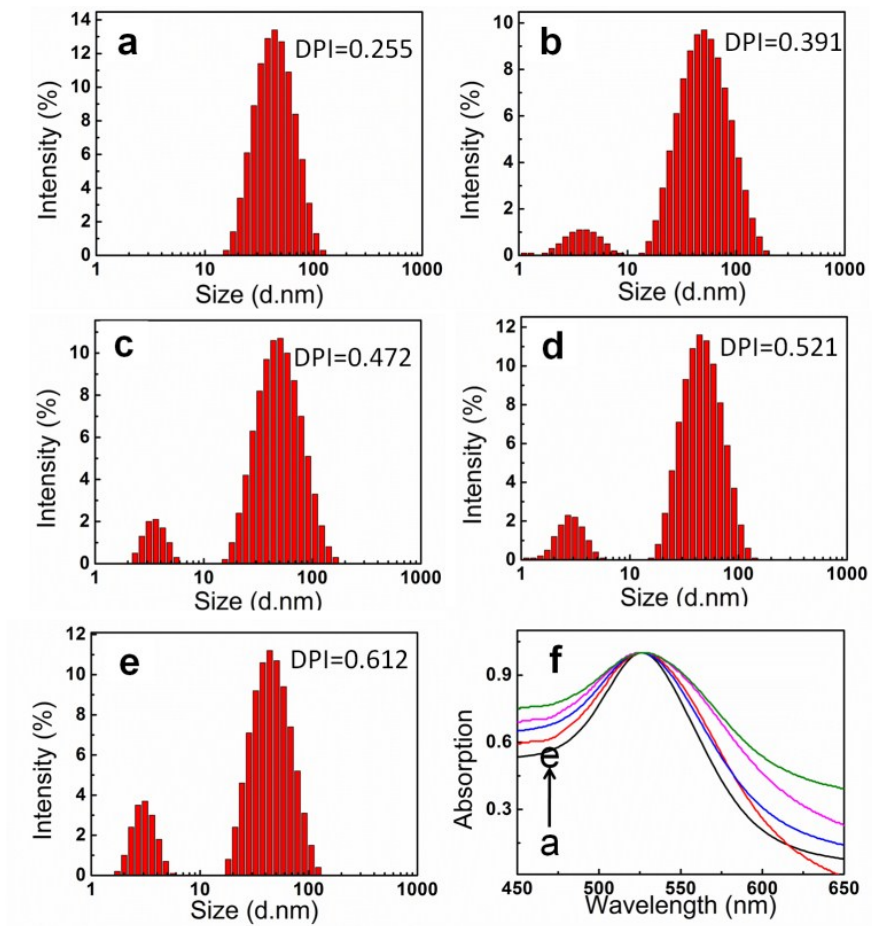

**S-Figure 1.** Hydrodynamic diameter distribution of AuNPs with PDI (a: 0.26; b: 0.39; c: 0.47; d: 0.52; e: 0.61 ) and their corresponding UV-vis absorption spectra (f).
